# Supplementary material for: RsTTG1, a WD40 Protein, Interacts with the bHLH Transcription Factor RsTT8 to Regulate Anthocyanin and Proanthocyanidin Biosynthesis in Raphanus sativus
Source: MDPI journal article supplement (doi:10.3390/ijms231911973), 2022-10-09
Supplement: s1 [file s1]

**Supplementary Table S1. Gene IDs and specific primers for RT-qPCR analysis.**

| Gene name | Gene ID                   | Forward primer (5'-3') | Reverse primer (5'-3')  |
|-----------|---------------------------|------------------------|-------------------------|
| RsTTG1    | Rs168100.1 <sup>a</sup>   | AACAGCAAGACGTCCGAGTT   | GATGTCGTGGACCTCCTTGT    |
| RsTT8     | Rs527700.1 <sup>a</sup>   | AGTGATCGGAGCTGAGGAAA   | ACTTGCTTCCTCCTCGCATA    |
| RsMYB1    | Rs388430.1 <sup>a</sup>   | GTGCATGGACTGCTGAAGAA   | CAGTCCGACCGGGTAATCTA    |
| RsPAL     | Rs215330.1 <sup>a</sup>   | CGTCTCCTCAGTGGCTAG     | CGTGAATCGCTTTGTTCT      |
| RsCHS     | Rs065380.1 <sup>a</sup>   | GTGACTGGAACCTCCCTCT    | CTCTCATCTTCTCAGCCTTG    |
| RsCHI     | Rs260580.1 <sup>a</sup>   | TCCATCCTCTTCGCTCTC     | GACACACGGTTCTTTCCAA     |
| RsF3H     | Rs341050.1 <sup>a</sup>   | TTACAAGCCACACGAGAC     | ATGGTCGCCTAGATTAACAAC   |
| RsF3'H    | Rs392880.1 <sup>a</sup>   | AGACTCCATCCACCAACACC   | TCTCGGGTCGAAACGATAAC    |
| RsDFR     | Rs305760.1 <sup>a</sup>   | GCTCATCAACGAAGGCTTTC   | TTATTTAAAGCCATTATAG     |
| RsANS     | Rs055270.1 <sup>a</sup>   | GAAGTTGGTGGCTTAGAAGAG  | ATGTTGTGTAGAATCAAGGTCAA |
| RsRPII    | Rs306620.1 <sup>a</sup>   | ATCACGCTAAATGGTCTCCT   | GCTGCTCTCAATCAAGTCAATC  |
| NtPAL     | NM_001325423 <sup>b</sup> | ATTGAGGTCATCCGTTCTGC   | ACCGTGTAACGCCTTGTTTC    |
| Nt4CL     | NM_001325738 <sup>b</sup> | TCATTGACGAGGATGACGAG   | TGGGATGGTTGAGAAGAAGG    |
| NtCHS     | KU949020 <sup>b</sup>     | TTGTTCGAGCTTGTCTCTGC   | AGCCCAGGAACATCTTTGAG    |
| NtCHI     | NM_001325287 <sup>b</sup> | GTCAGGCCATTGAAAAGCTC   | CTAATCGTCAATGCCCCAAC    |
| NtF3H     | NM_001325083 <sup>b</sup> | CAAGGCATGTGTGGATATGG   | TGTGTCGTTTCAGTCCAAGG    |
| NtF3'H    | XM_016592903 <sup>b</sup> | AGGCTCAACACTTCTCGT     | CATCAACTTTGGGCTTCT      |
| NtDFR     | NM_001325732 <sup>b</sup> | AACCAACAGTCAGGGGAATG   | TTGGACATCGACAGTTCCAG    |
| NtANS     | MF445066 <sup>b</sup>     | TGGCGTTGAAGCTCATACTG   | GGAATTAGGCACACACTTTGC   |
| NtUFGT    | NM_001325312 <sup>b</sup> | CAATGTTTGGGATGGTGTCA   | TTCTCCTCTGCCTCTTTCA     |
| NtGAPDH   | XR_001648122 <sup>b</sup> | GGTGTCCACAGACTTCGTGG   | GACTCCTCACAGCAGCACCA    |

<sup>a</sup> Radish genome database, <http://radish-genome.org/>; <sup>b</sup> NCBI, <https://www.ncbi.nlm.nih.gov>

**Supplementary Table S2. List of primers used for cloning and vector construction in this study.**

| Usage                                      | Primer name        | Primer sequence                            |
|--------------------------------------------|--------------------|--------------------------------------------|
| Gene cloning                               | 5'race-TTG1-R1     | CCCCCAGGCGATGTCGTGGACCTCCTTGTC             |
|                                            | 5'race-TTG1-R2     | GATGGTGGAGTGCTCCTTGTCGCGGAG                |
|                                            | 3'race-TTG1-F1     | ACCGGACTCTCTACCTAGATCCGAAACCGCCG           |
|                                            | 3'race-TTG1-F2     | CGCCATGTCCTTCTCCTCCTCCTCCTCCAC             |
|                                            | RsTTG1-F           | ATGGACAACCTCAGCACCGGACTCTCTA               |
|                                            | RsTTG1-R           | TCAAACCTCTAAGGAGCTGCATTTTATTAGC            |
| Yeast two hybrid                           | pGBKT7-RsTTG1-F    | CATGGAGGCCGAATTCATGGACAACCTCAGCACCG        |
|                                            | pGBKT7-RsTTG1-R    | GGATCCCCGGAATTCAACTCTAAGGAGCTGCATTT        |
|                                            | pGBKT7-RsTT8-F     | CATGGAGGCCGAATTCATGGATGAATCAAGTATTATAC     |
|                                            | pGBKT7-RsTT8M-R    | GGATCCCCGGAATTTCGAAGAACTCTTCATGTGTTCAAC    |
|                                            | pGBKT7-RsTT8N-R    | GGATCCCCGGAATTTCAGGAACCTCTCAAGATCATGTGTTTG |
|                                            | pGBKT7-RsTT8C-F    | CATGGAGGCCGAATTCATGAAGAAGACGAAGAAGTAG      |
|                                            | pGBKT7-RsTT8-R     | GGATCCCCGGAATTCGAGTTTATTTTGAGATAT          |
|                                            | pGBKT7-RsMYB1-F    | CATGGAGGCCGAATTCATGGAGGGTTCGTCCAAAG        |
|                                            | pGBKT7-RsMYB1-R    | GGATCCCCGGAATTCCACAGTCTCTCCATCTAAC         |
|                                            | pGADT7-RsTTG1-F    | GGAGGCCAGTGAATTCATGGACAACCTCAGCACCC        |
|                                            | pGADT7-RsTTG1N-R   | CACCCGGGTGGAATTCGGACGTCTTGCTGTTGTT         |
|                                            | pGADT7-RsTTG1WD-R  | CACCCGGGTGGAATTCGTCGGCAACTCCCA             |
|                                            | pGADT7-RsTTG1C-F   | GGAGGCCAGTGAATTCATGGACAACCTCAGCACCG        |
|                                            | pGADT7-RsTTG1-R    | CACCCGGGTGGAATTCAACTCTAAGGAGCTGCATTT       |
|                                            | pGADT7-RsTT8-F     | GGAGGCCAGTGAATTCATGGATGAATCAAGTATTATAC     |
|                                            | pGADT7-RsTT8-R     | CACCCGGGTGGAATTCGAGTTTATTTTGAGATAT         |
|                                            | pGADT7-RsMYB1-F    | GGAGGCCAGTGAATTCATGGAGGGTTCGTCCAAAG        |
|                                            | pGADT7-RsMYB1-R    | CACCCGGGTGGAATTCACAGTCTCTCCATCTAAC         |
| Subcellular/<br>Intracellular localization | p326-RsTTG1-sGFP-F | CACGGGGGACTCTAGAATGGACAACCTCAGCACCG        |
|                                            | p326-RsTTG1-sGFP-R | CCATGGATCCTCTAGAACTCTAAGGAGCTGCATTT        |
|                                            | p326-RsTT8-sGFP-F  | CACGGGGGACTCTAGAATGGATGAATCAAGTATTATAC     |
|                                            | p326-RsTT8-sGFP-R  | CCATGGATCCTCTAGAGAGTTTATTTTGAGATATGATTT    |
|                                            | p326-RsMYB1-sGFP-F | CACGGGGGACTCTAGAATGGAGGGTTCGTCCAAAG        |
|                                            | p326-RsMYB1-sGFP-R | CCATGGATCCTCTAGACACAGTCTCTCCATCTAAC        |
|                                            | p326-RsTT8-F       | CACGGGGGACTCTAGAGGATCCATGGATGAATCAAGTATTA  |
|                                            | p326-RsTT8-R       | TTTGAACGATCGCGGCCGCTAGAGTTTATTTTGAGATATG   |
|                                            | p326-RsMYB1-F      | CACGGGGGACTCTAGAGGATCCATGGAGGGTTCGTCCAAA   |
|                                            | p326-RsMYB1-R      | TTTGAACGATCGCGGCCGCTTACACAGTCTCTCCATCTAACA |
| In planta assay                            | RsTTG1-F           | ATGGACAACCTCAGCACCGGACTCTCTA               |
|                                            | RsTTG1-R           | TCAAACCTCTAAGGAGCTGCATTTTATTAGC            |
|                                            | RsTT8-F            | ATGGATGAATCAAGTATTATACCGGTATGG             |
|                                            | RsTT8-R            | CTAGAGTTTATTTTGAGATATGATTTGATGG            |
|                                            | RsMYB1-F           | ATGGAGGGTTCGTCCAAAGGG CTGAG                |
|                                            | RsMYB1-R           | TTACACAGTCTCTCCATCTAACAGGCT                |
|                                            | pDONR-RsTTG1-F     | AAAAAAGCAGGCTCCATGGACAACCTCAGCACCG         |
|                                            | pDONR-RsTTG1-R     | GTACAAGAAAGCTGGGTCTCAAACCTCTAAGGAGCTG      |

|                     |                    |                                           |
|---------------------|--------------------|-------------------------------------------|
|                     | pDONR-RsTT8-F      | AAAAAAGCAGGCTCCATGGATGAATCAAGTATTA        |
|                     | pDONR-RsTT8-R      | GTACAAGAAAGCTGGGTCCTAGAGTTTATTTTGAGATATG  |
|                     | pDONR-RsMYB1-F     | AAAAAAGCAGGCTCCATGGAGGGTTCGTCCAAAGG       |
|                     | pDONR-RsMYB1-R     | GTACAAGAAAGCTGGGTCTTACACAGTCTCTCCATC      |
| Promoter activation | pUC-proRsCHS-LUC-F | AGGCTCTAGAGGATCCGAACCCACCTTAAAACTTC       |
|                     | pUC-proRsCHS-LUC-R | TTGGCGTCTTCCATGGATTAAACCAACTAGGTTTTCACTAG |
|                     | pUC-proRsDFR-LUC-F | AGGCTCTAGAGGATCCCATGATCTATTCAGAAAGTTGTTTT |
|                     | pUC-proRsDFR-LUC-R | TTGGCGTCTTCCATGGTTTTGTGTGTGTTGAAAAGATGGA  |

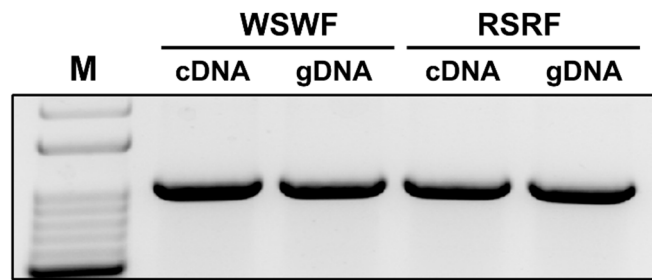

Supplementary Figure S1. Gel electrophoresis of amplified fragments of the RsTTG1 using radish cDNA or genomic DNA as template. The RsTTG1 sequences were amplified by specific primers using cDNA or genomic DNA of radish cultivar WSWF and RSRF, respectively. M: 100 bp DNA size marker.
